# Supplementary material
Source: publisher site journal article supplement (https://www.dovepress.com/article/539436)
Supplement: Supplementary file 1 [file 539436%20Supplementary%20Material.pdf]

Supplementary Table 1 Baseline of clinical samples.

| Baseline             | Healthy controls<br>(n=9) | Psoriasis<br>(n=9) |
|----------------------|---------------------------|--------------------|
| Age (mean±SD)        | 39.52±10.31               | 42.26±11.24        |
| Gender (male/female) | 5/4                       | 5/4                |
| PASI                 | -                         | 7.71±3.85          |

SD, standard deviation; PASI, psoriasis area, and severity index.

Supplementary Table 2 Sequence of primers.

| Name           | Forward                      | Reverse                      |
|----------------|------------------------------|------------------------------|
| <i>Flg</i>     | 5'-TACTGGTGCTAAAGCTGGCAA-3'  | 5'-CCACCATGCCTCCGTCTAAG -3'  |
| <i>Krt 14</i>  | 5'-GCAGTATCCGATCTCTTCATGC-3' | 5'-GGCCCTCGAATCCTCTGACT-3'   |
| <i>Krt 10</i>  | 5'-CGGAAACGAGAAGGTGACCA-3'   | 5'-GCACGTTGGCATTGTCAGTT-3'   |
| <i>β-actin</i> | 5'-GGCTGTATTCCCCTCCATCG-3'   | 5'-CCAGTTGGTAACAATGCCATGT-3' |

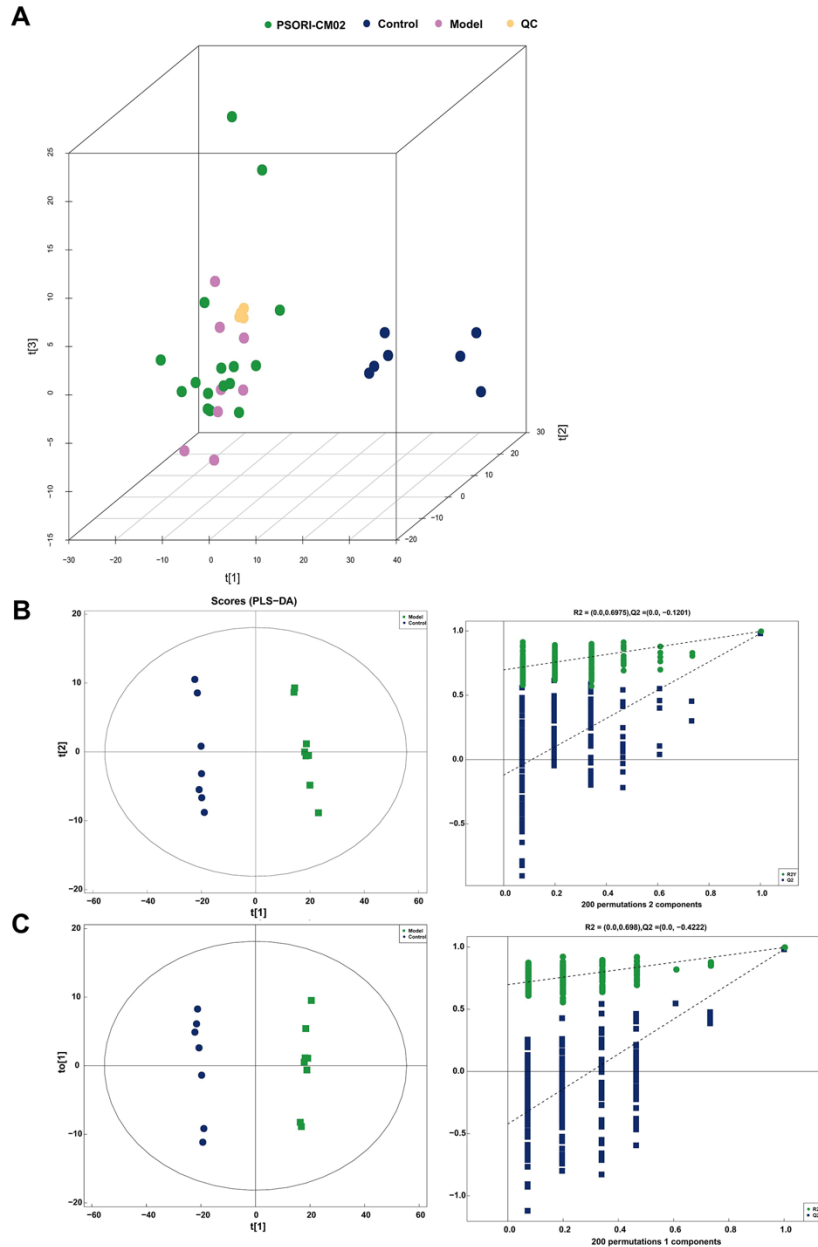

**Supplementary Figure 1.** (A) PCA score plots derived from mice in the control, model, MTX, and PSORI-CM02 groups and quality control samples. (B) PLS-DA score plot and validation of the corresponding PLS-DA model through permutation analysis. (C) OPLS-DA score plot and validation of the corresponding OPLS-DA model through permutation analysis.  $R^2$  represents the explained variance, whereas  $Q^2$  indicates the predictive capability of the model. QC, quality control; PCA, principal component analysis; PLS-DA, partial least squares discriminant analysis; OPLS-DA, orthogonal partial least squares discriminant analysis.

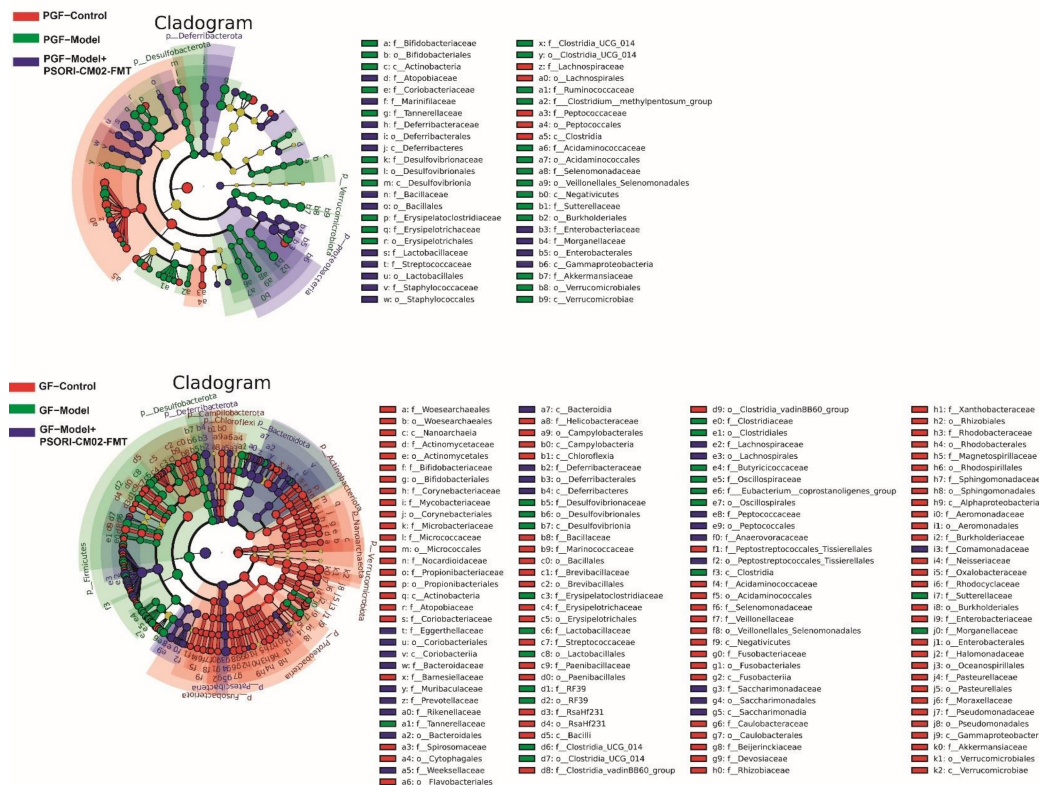

**Supplementary Figure 2.** Cladogram of the LefSe analysis results from PGF and GF mice. SPF, Specific pathogen-free; PGF, pseudo germ-free; GF, germ-free; FMT, fecal microbiota transplantation; LefSe, linear discriminant analysis effect size.

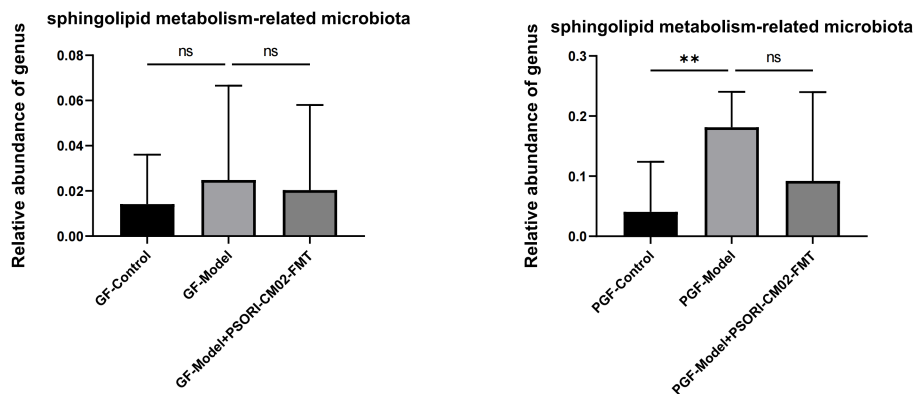

**Supplementary Figure 3.** The total relative abundance of sphingolipid metabolism-related microbiome species at the genus level in GF and PGF mice. PGF, pseudo germ-free; GF, germ-free; FMT, fecal microbiota transplantation; \*\* $p < 0.01$ , ns, not significant, compared with the model group.
